# Supplementary material
Source: Research Square preprint supplement (doi:10.21203/rs.3.rs-9716351/v1)

A

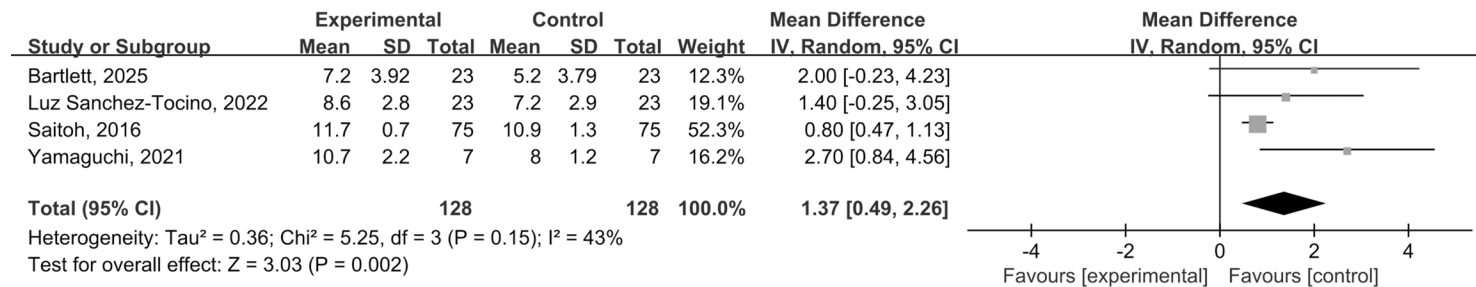

B

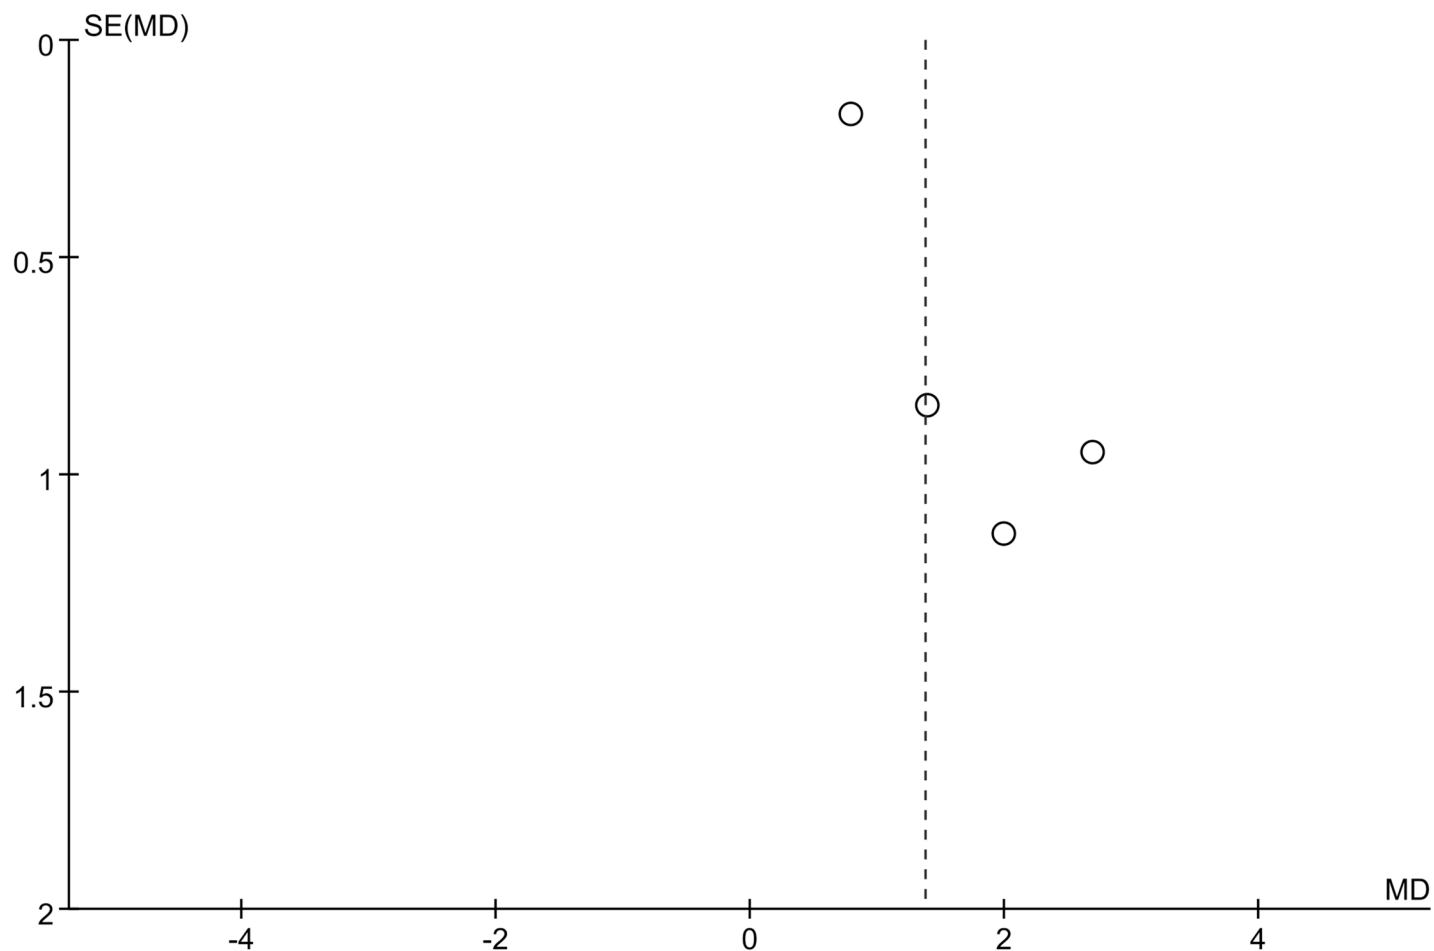

Supplement: Supplementary file 1 [file c755ce53c6fb0908dfd70687.pdf]
